# Supplementary material for: Highly efficient hydrogenation of carbon dioxide to methyl formate over supported gold catalysts
Source: Royal Society of Chemistry journal article supplement (doi:10.1039/c4gc01818d), 2014-11-19
Supplement: c4gc01818d4.pdf [file c4gc01818d4.pdf]

### Supporting Information

#### Highly efficient hydrogenation of carbon dioxide to methyl formate over supported gold catalysts

Congyi Wu, Zhaofu Zhang,\* Qinggong Zhu, Hongling Han, Yingying Yang and Buxing Han\*

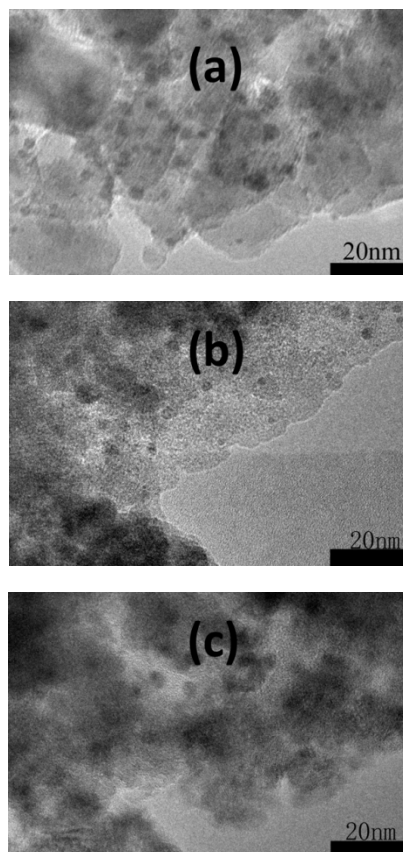

**Fig.S1** The TEM images of the Au/ZrO<sub>2</sub>-9.0 catalysts before (a) and after reaction at 120 °C; (b) and 140 °C; (c) for 7 hours. Other reaction conditions were the same as that for Fig. 4b. ( Fig. S1a is the same as Figure 1e, which is shown here for easier comparison.)
