# Supplementary figures and images for: Highly efficient hydrogenation of carbon dioxide to methyl formate over supported gold catalysts
Source: Royal Society of Chemistry journal article supplement (doi:10.1039/c4gc01818d), 2014-11-19

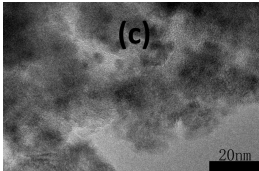

Supplement: c4gc01818d3.pdf [file c4gc01818d3.pdf]
